# Supplementary material for: A synthetic map of the north-west European Shelf sedimentary environment for applications in marine science
Source: Copernicus journal article supplement (doi:10.5194/essd-10-109-2018), 2018-01-23
Supplement: Supplementary file 1 [file essd-10-109-2018-supplement.zip]

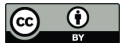

## *Supplement of*

# **A synthetic map of the north-west European Shelf sedimentary environment for applications in marine science**

**Robert J. Wilson et al.**

*Correspondence to:* Robert J. Wilson ([robert.wilson@strath.ac.uk](mailto:robert.wilson@strath.ac.uk))

- [essd-10-109-2018-supplement-title-page.pdf](#)
- [disturbance.png](#)
- [gravel\\_d50.png](#)
- [gravel\\_pc.png](#)
- [mud\\_pc.png](#)
- [permeability.png](#)
- [poc.png](#)
- [porosity.png](#)
- [rock\\_50cm.png](#)
- [rock\\_surface.png](#)
- [sand\\_d50.png](#)
- [sand\\_pc.png](#)
- [tn.png](#)
- [totald50\\_pc.png](#)

The copyright of individual parts of the supplement might differ from the CC BY 4.0 License.
